# Supplementary material for: DFT-based microkinetic model analysis of dry reforming of methane over Ru7/CeO2(111) and Ru7/CeO2(110): key role of surface lattice oxygen vacancy
Source: Royal Society of Chemistry journal article supplement (doi:10.1039/d1cy01934a), 2022-01-01
Supplement: d1cy01934a1.pdf [file d1cy01934a1.pdf]

## *Supporting information*

### **DFT-Based Microkinetic Model Analysis of Dry Reforming of Methane over Ru<sub>7</sub>/CeO<sub>2</sub>(111) and Ru<sub>7</sub>/CeO<sub>2</sub>(110): Key Role of Surface Lattice Oxygen Vacancy**

Peng-Fei Qu, Gui-Chang Wang\*

(Key Laboratory of Advanced Energy Materials Chemistry (Ministry of Education) and the Tianjin key Lab and  
Molecule-based Material Chemistry, College of Chemistry, Nankai University, Tianjin 300071, China)

\*Corresponding author: Gui-Chang Wang. E-mail: [wanguichang@nankai.edu.cn](mailto:wanguichang@nankai.edu.cn)

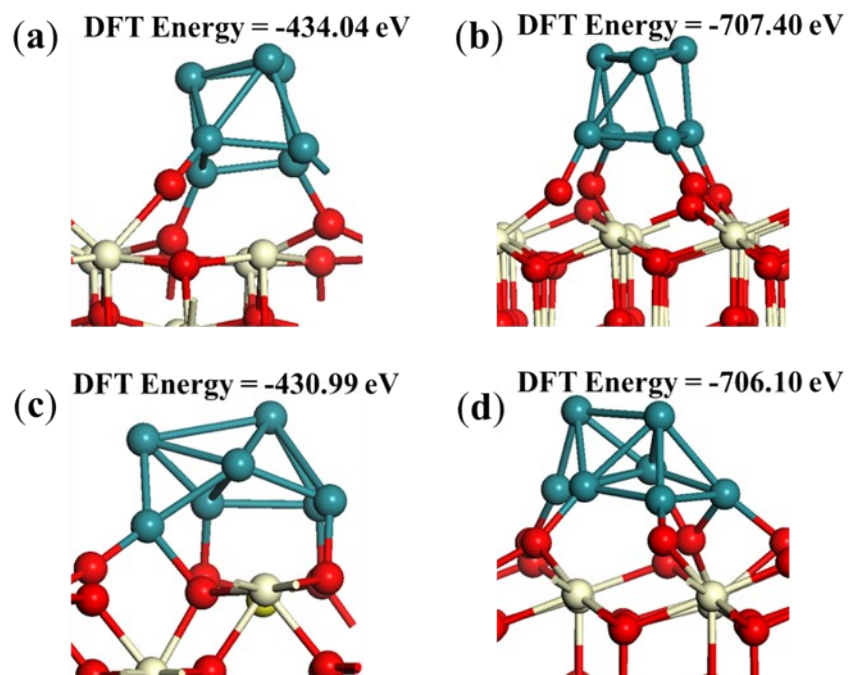

**Fig. S1** (a) Stable configurations of Ru7 on CeO<sub>2</sub>(110), (b) stable configurations of Ru7 on CeO<sub>2</sub>(111), (c) metastable configurations of Ru7 on CeO<sub>2</sub>(110), (d) configurations of Ru7 on CeO<sub>2</sub>(111)

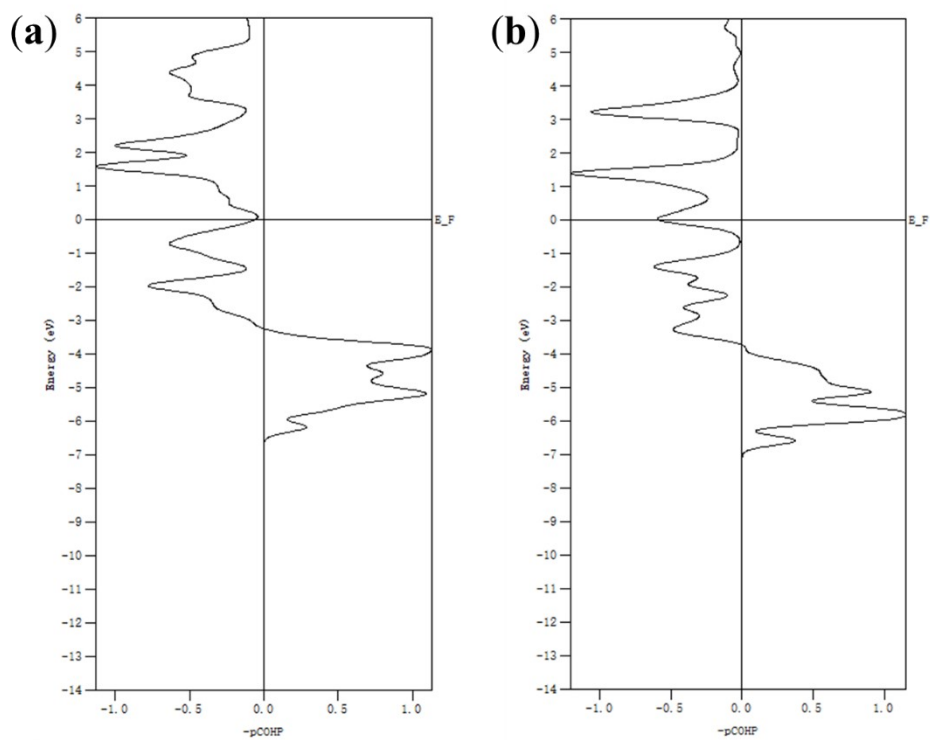

**Fig. S2** Crystal orbital Hamilton population (COHP) analysis for the nearest-neighbor interactions between O-Ru bond in (a) Ru<sub>7</sub>/CeO<sub>2</sub>(110) and (b) Ru<sub>7</sub>/CeO<sub>2</sub>(111)

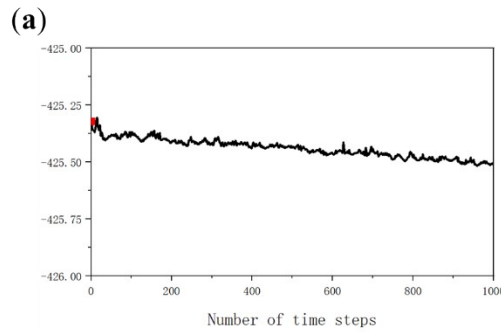

**Fig. S3** (a)Energy evolution versus the MD simulation steps at 1200 K for Ru7/CeO2(110), (b) the changes of bond distance between Ru and Ru atom during MD simulation

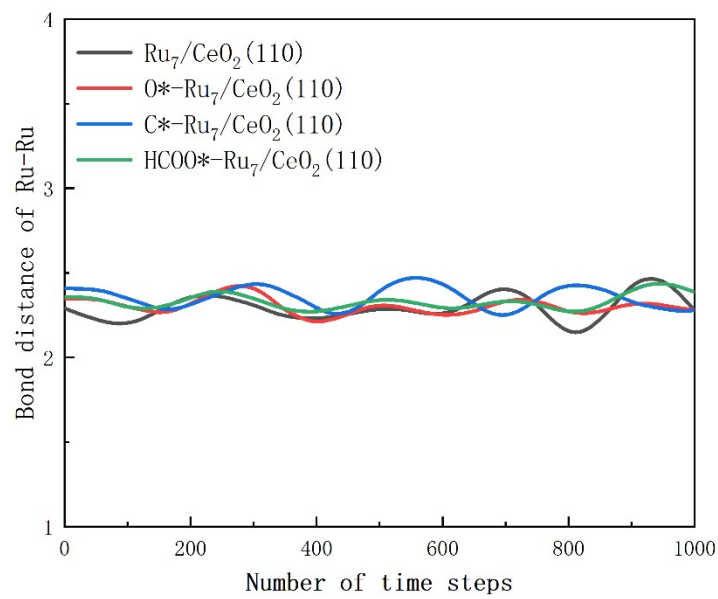

**Fig. S4** The changes of bond distance between Ru and Ru atom during MD simulation for Ru<sub>7</sub>/CeO<sub>2</sub>(110), the Ru<sub>7</sub>/CeO<sub>2</sub>(110) adsorbed intermediate O\*(O\*-Ru<sub>7</sub>/CeO<sub>2</sub>), C\*(C\*-Ru<sub>7</sub>/CeO<sub>2</sub>) and HCOO\*(HCOO\*-Ru<sub>7</sub>/CeO<sub>2</sub>).

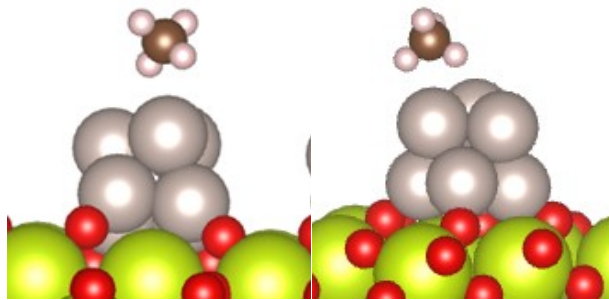

CH<sub>4</sub><sup>\*</sup>

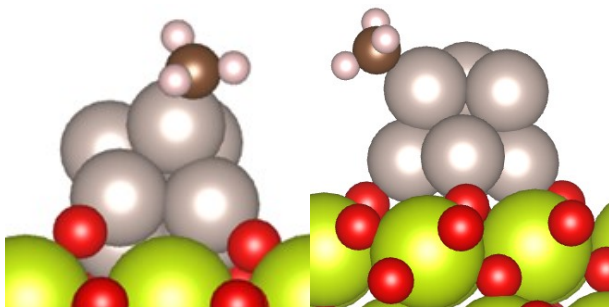

CH<sub>3</sub><sup>\*</sup>

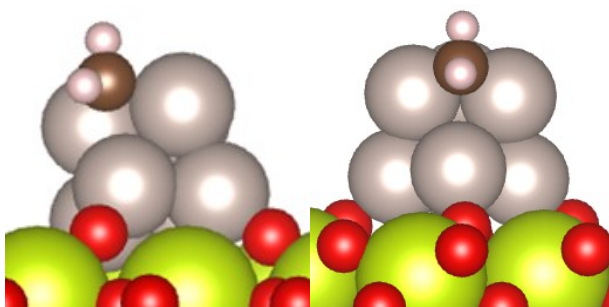

CH<sub>2</sub><sup>\*</sup>

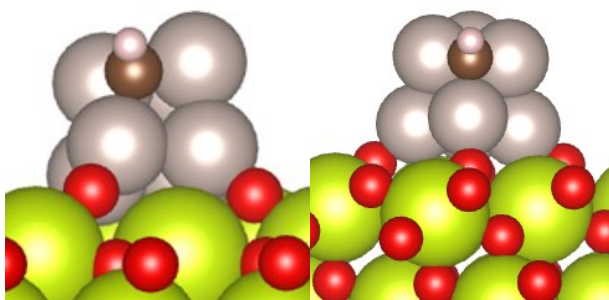

CH<sup>\*</sup>

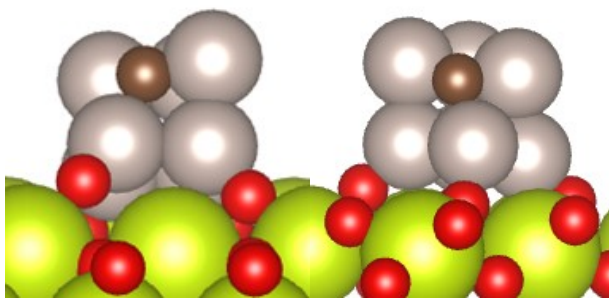

C\*

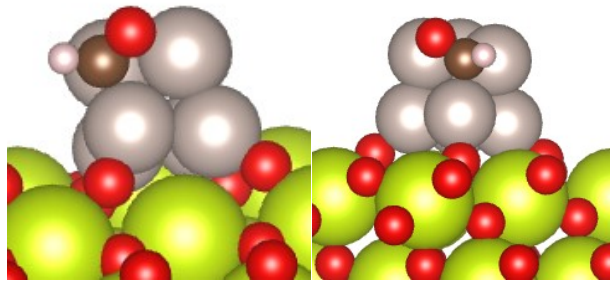

CHO\*

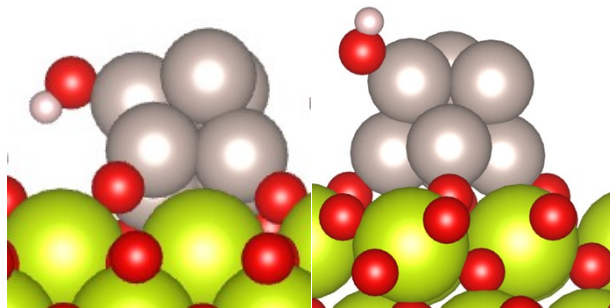

OH\*

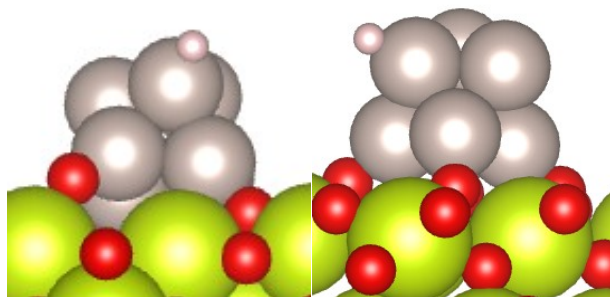

H\*

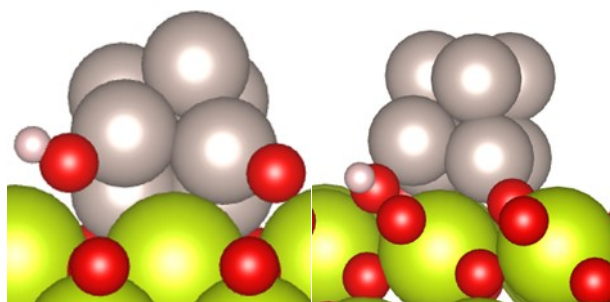

H-O<sub>L</sub>

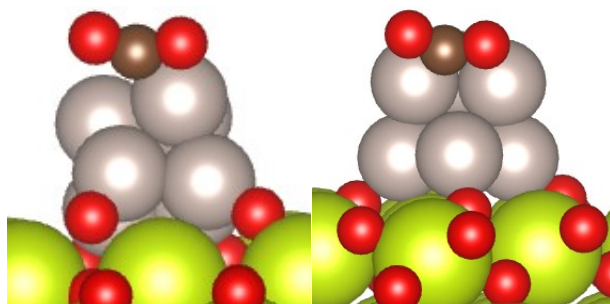

CO<sub>2</sub>\*

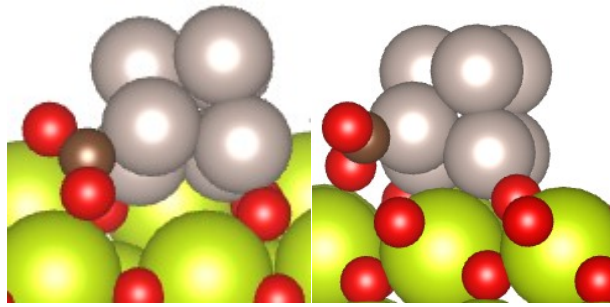

CO<sub>2</sub>#

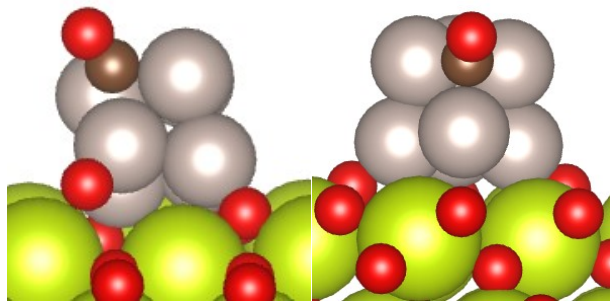

CO\*

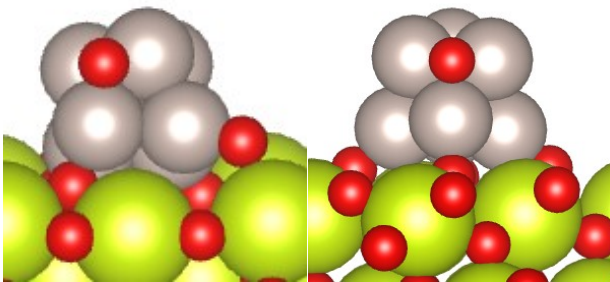

O\*

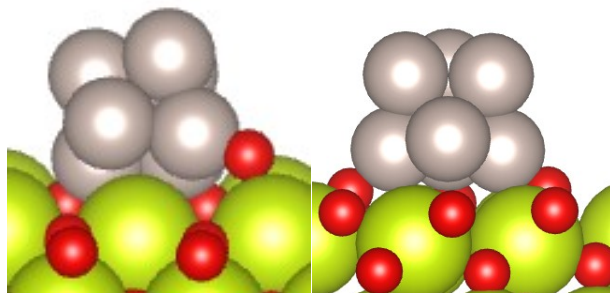

#

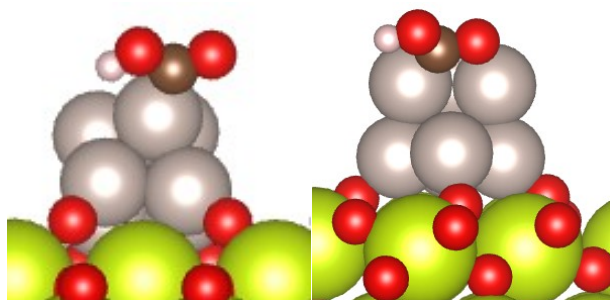

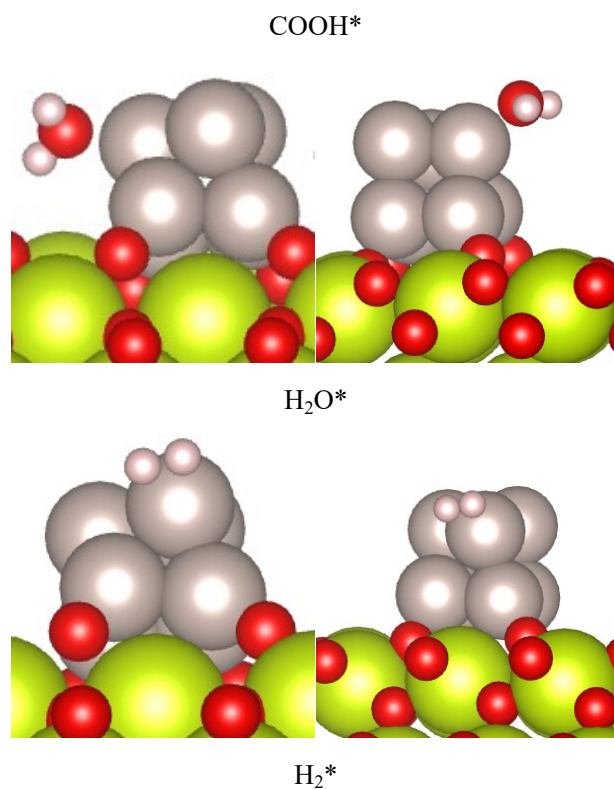

**Fig. S5** Adsorption structure of key species on Ru<sub>7</sub>/CeO<sub>2</sub>(110) and Ru<sub>7</sub>/CeO<sub>2</sub>(111)

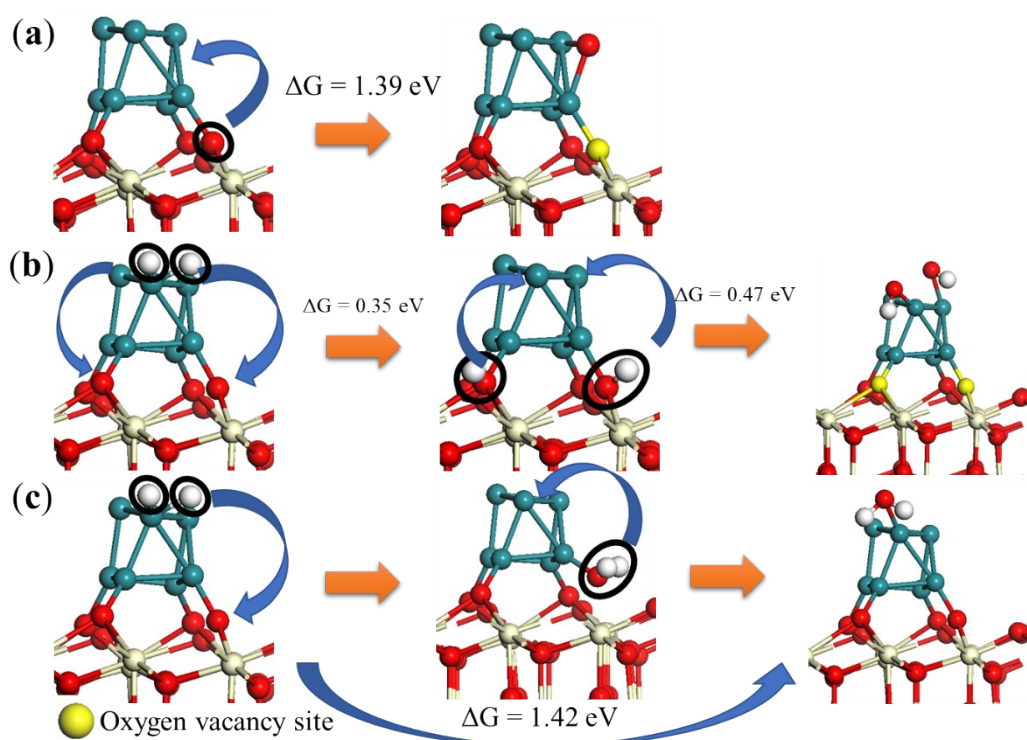

**Fig. S6** The mechanism of formation oxygen vacancy site and standard free energy ( $\Delta_r G^0$ ) at 1000K for Ru<sub>7</sub>/CeO<sub>2</sub>(111): (a) the oxygen reverse spillover mechanism, (b) the mechanism of H-assisted

oxygen reverse spillover mechanism, and (c) the mechanism of 2H with surface O# to form H<sub>2</sub>O.

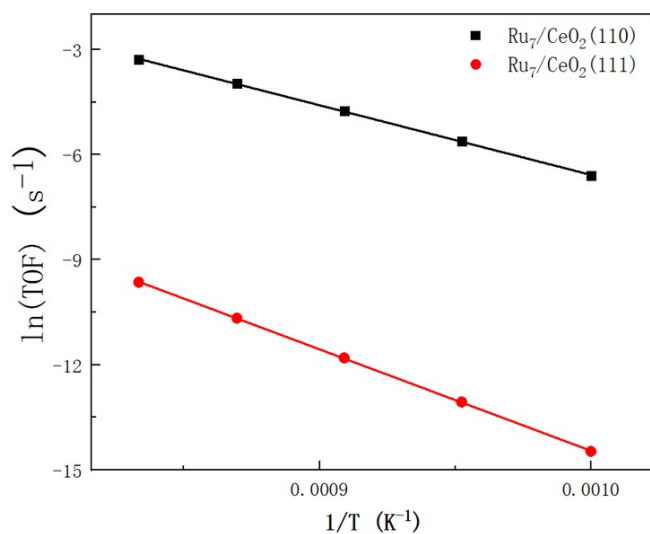

**Fig. S7** The variation law of ln(TOF) with 1/T over Ru<sub>7</sub>/CeO<sub>2</sub>(110) and Ru<sub>7</sub>/CeO<sub>2</sub>(111)

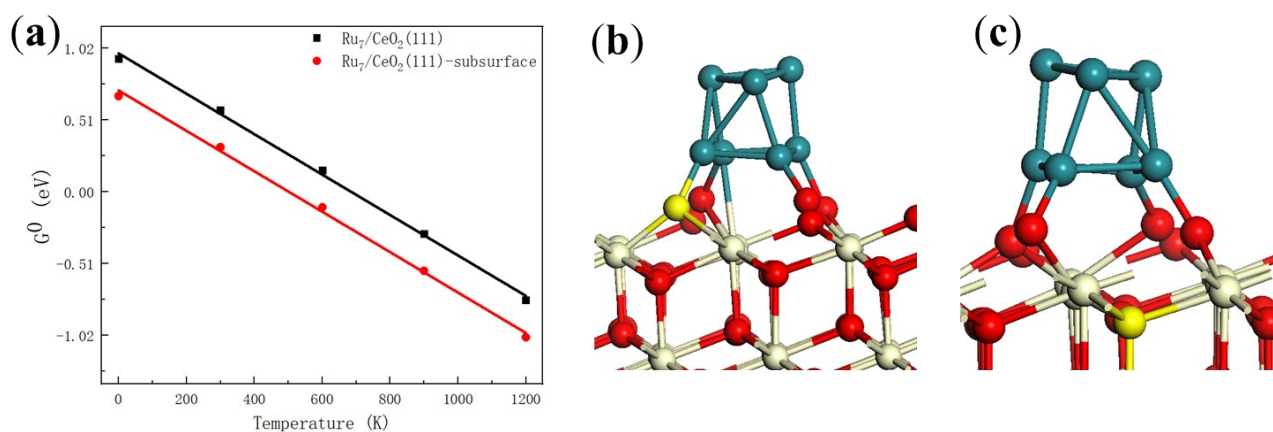

**Fig. S8** (a) Plot of the variety for the formation of oxygen vacancy with temperature (black line: oxygen vacancy on surface for Ru<sub>7</sub>/CeO<sub>2-x</sub>(111), red line: oxygen vacancy on subsurface for Ru<sub>7</sub>/CeO<sub>2-x</sub>(111)), (b) surface oxygen vacancy on Ru<sub>7</sub>/CeO<sub>2-x</sub>(111), (c) subsurface oxygen vacancy on Ru<sub>7</sub>/CeO<sub>2-x</sub>(111)



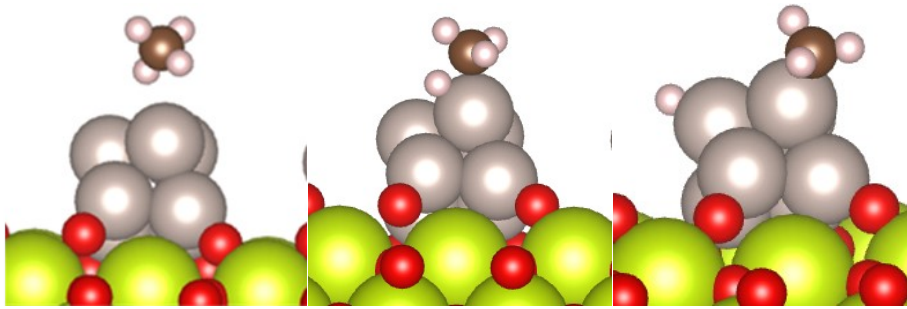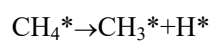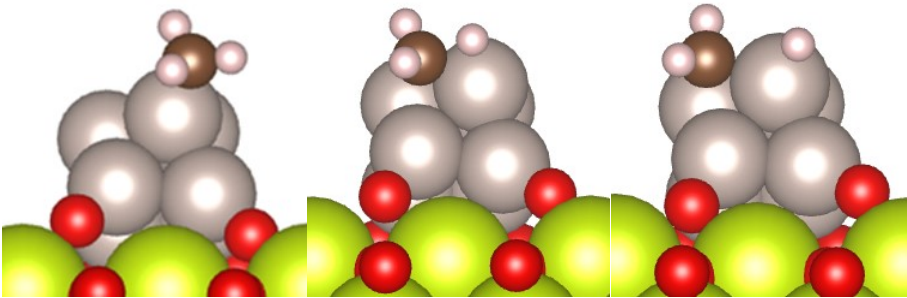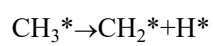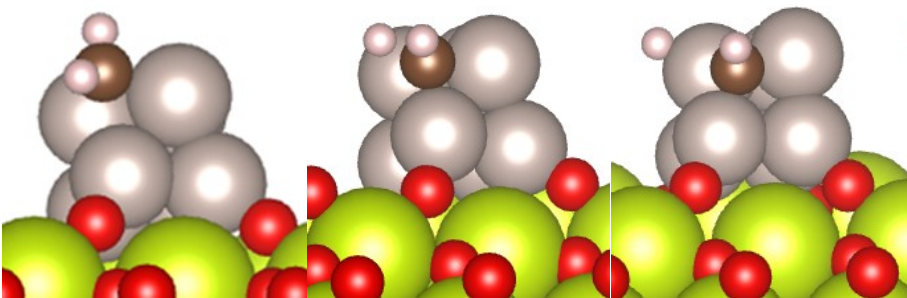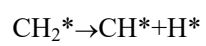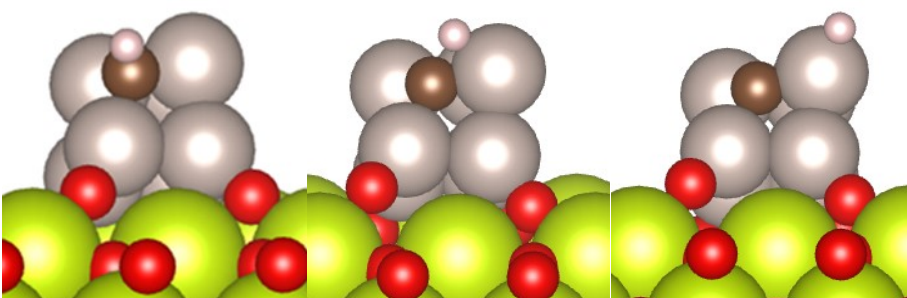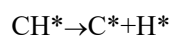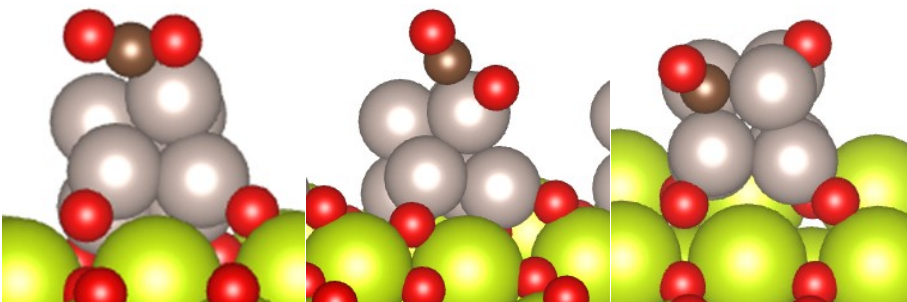

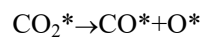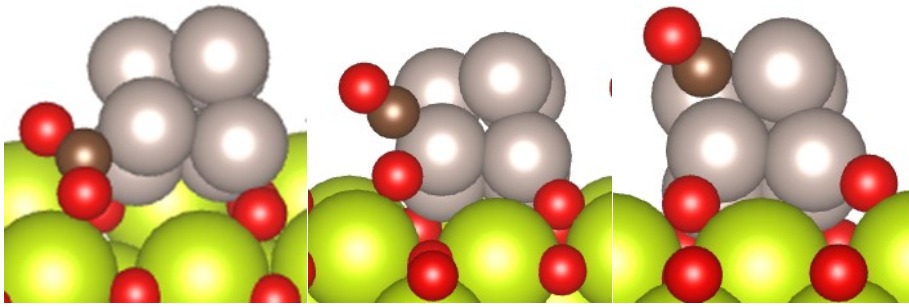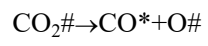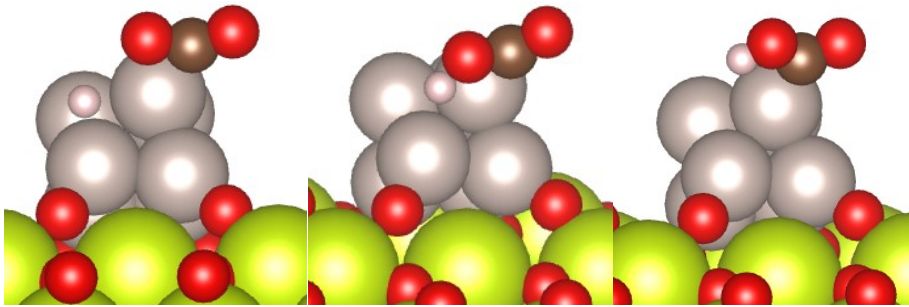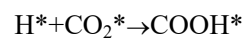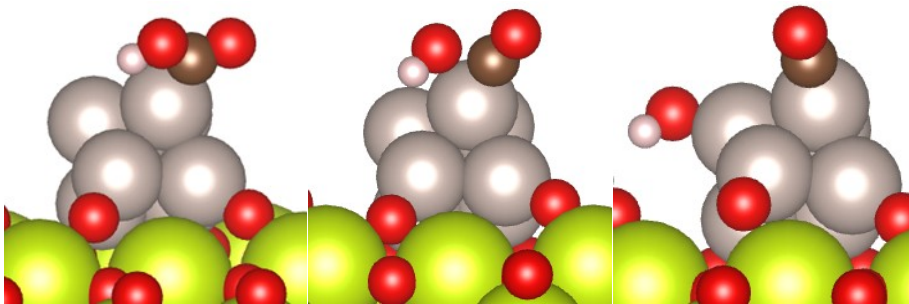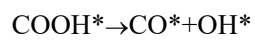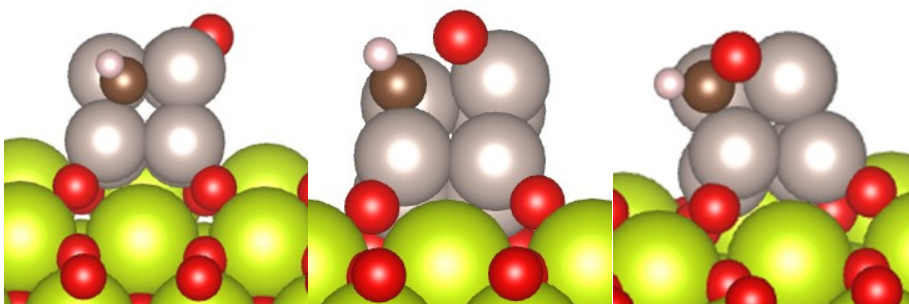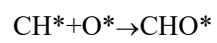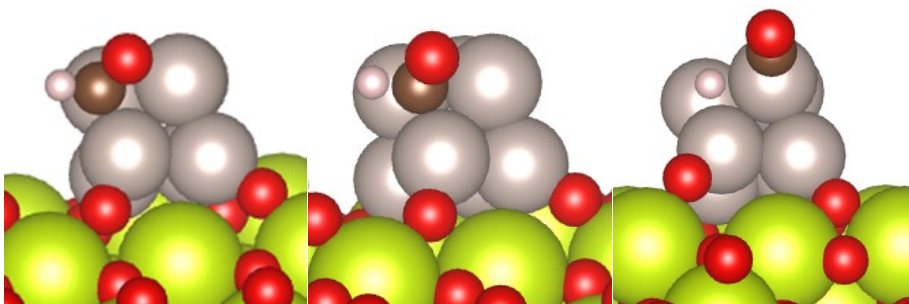

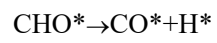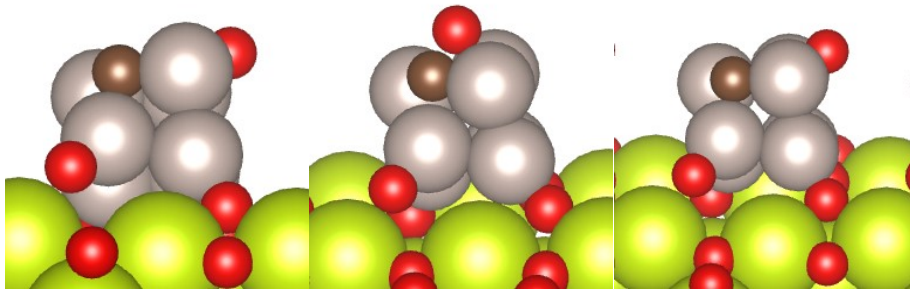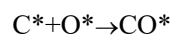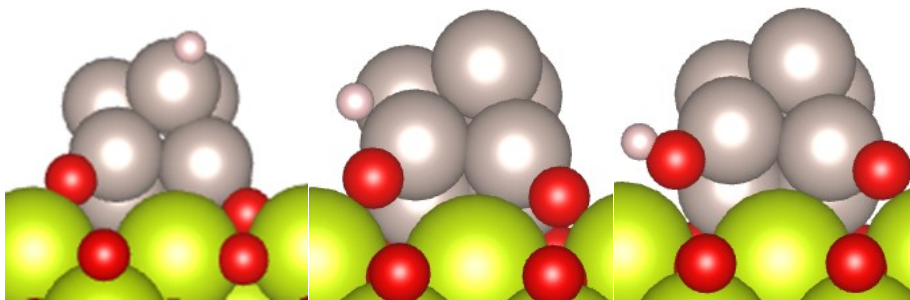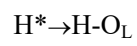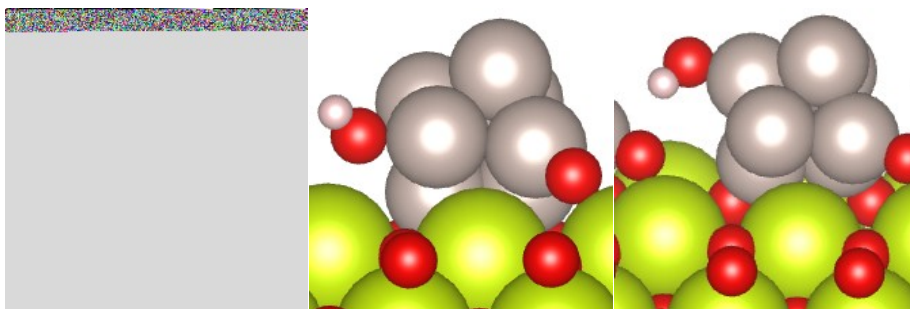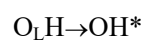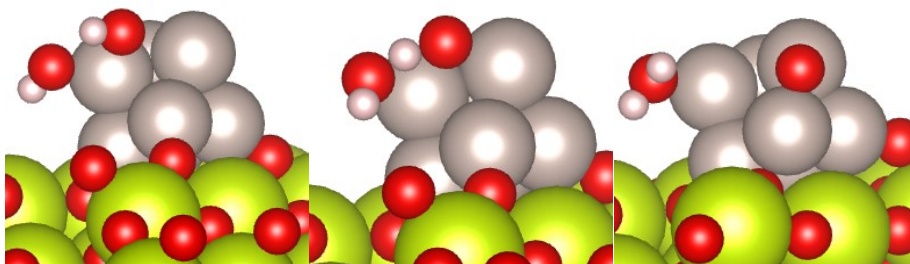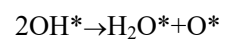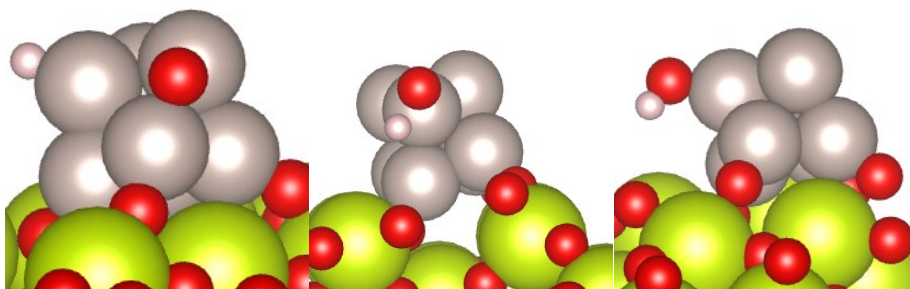

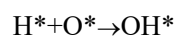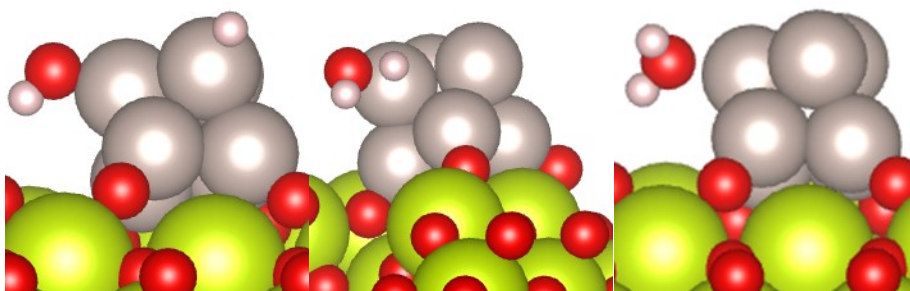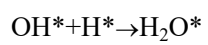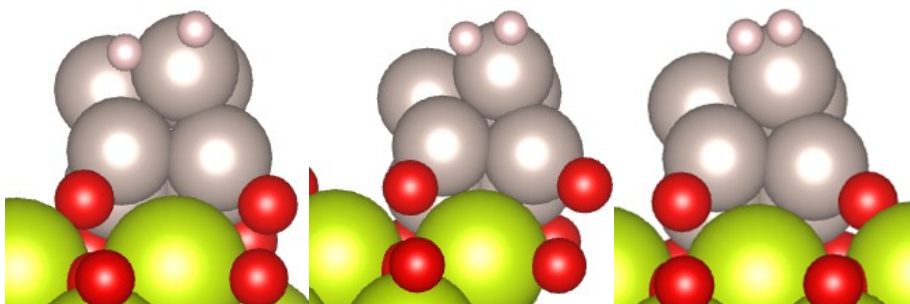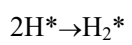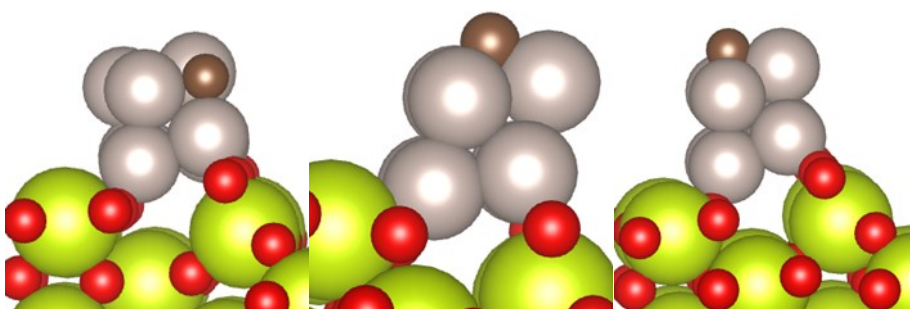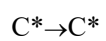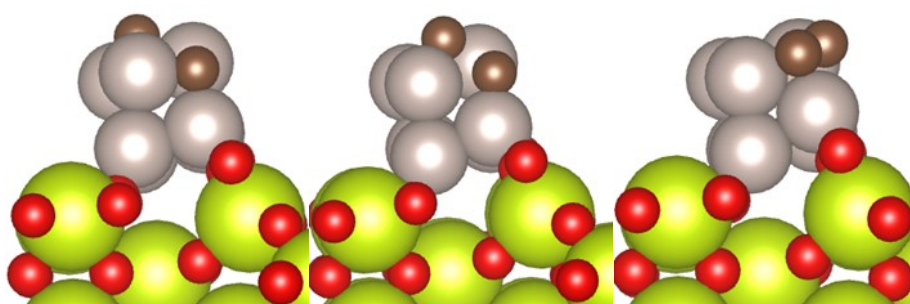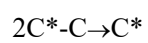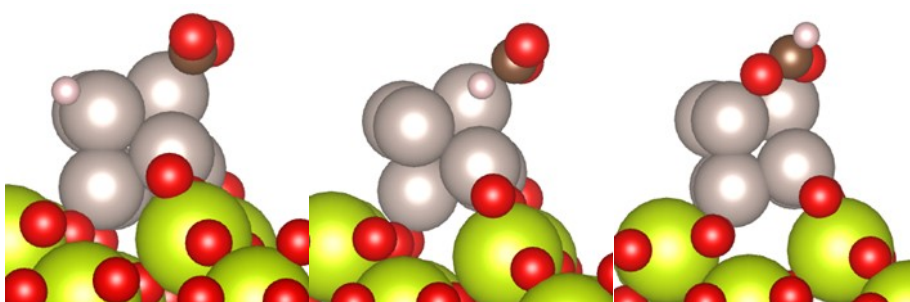

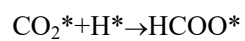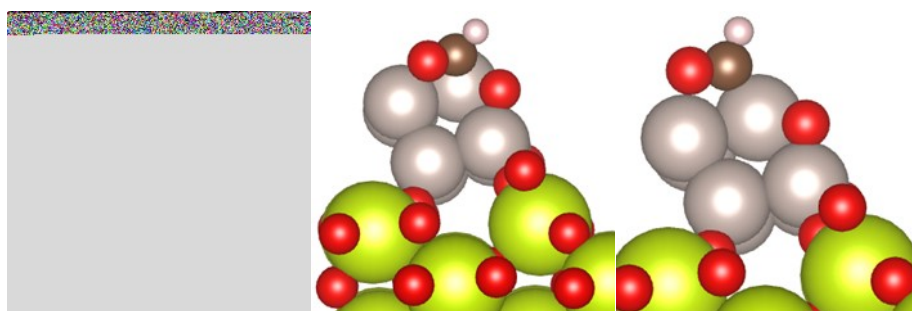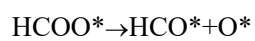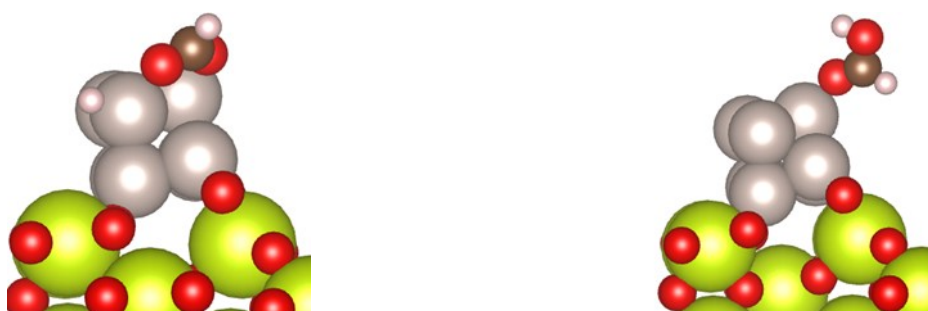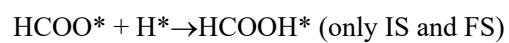

**Fig. S9** The IS, TS and FS structure on Ru<sub>7</sub>/CeO<sub>2</sub>(110)

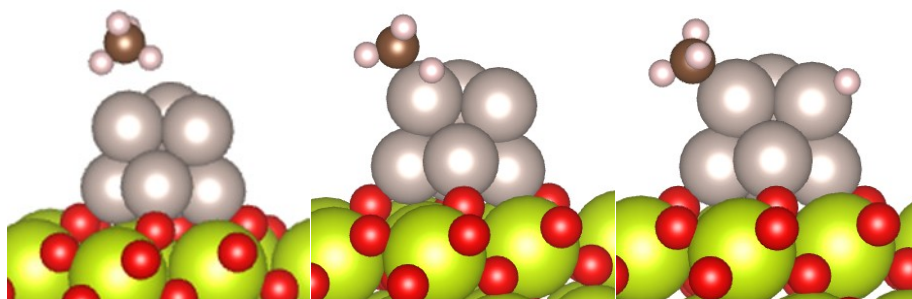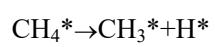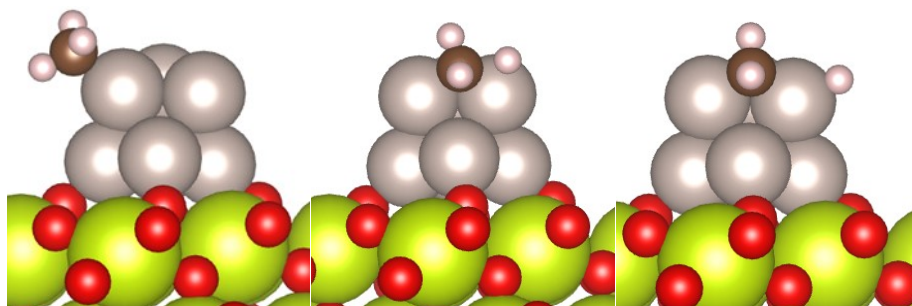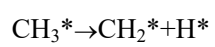

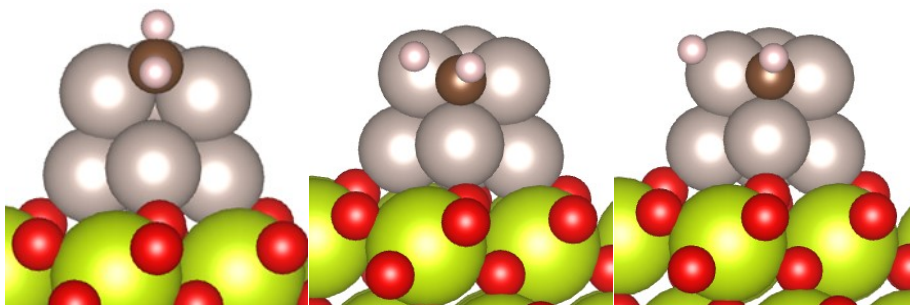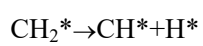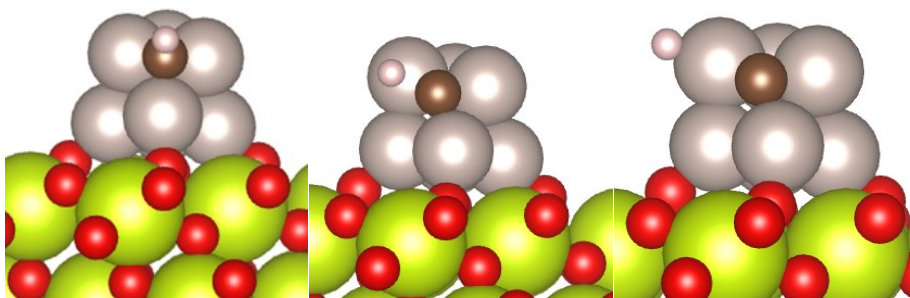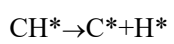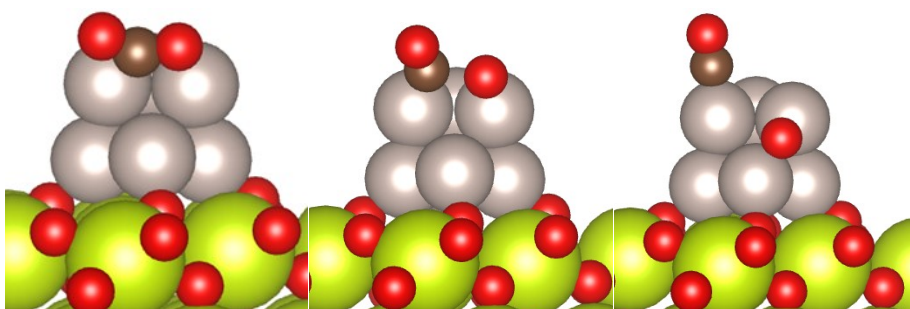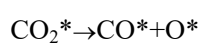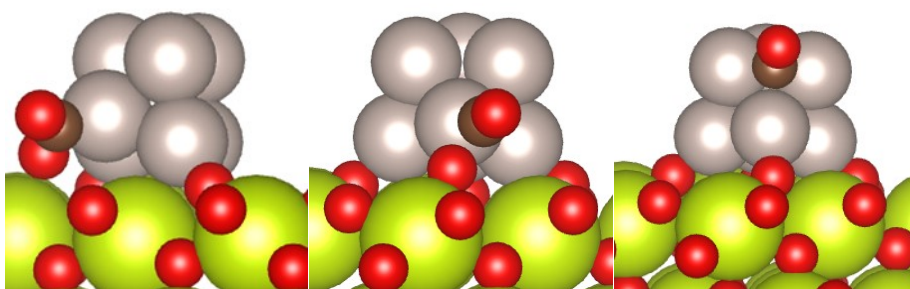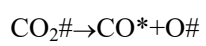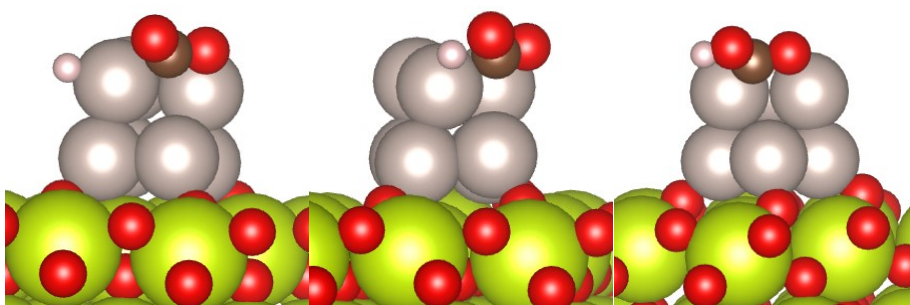

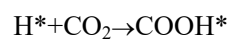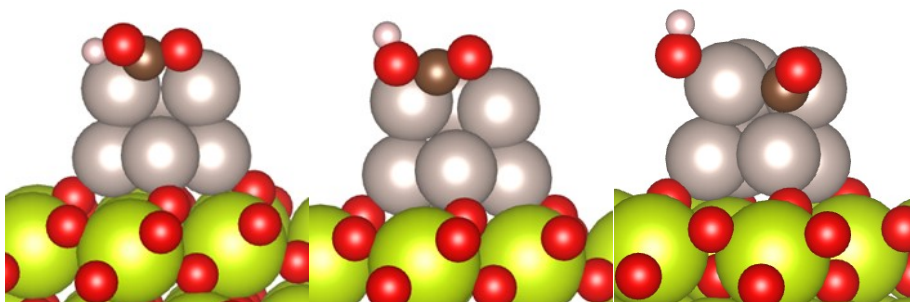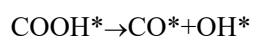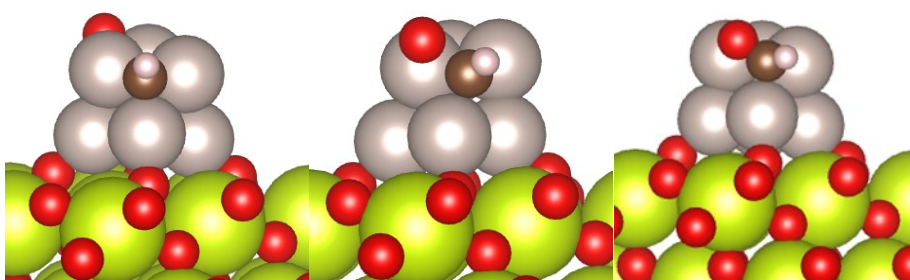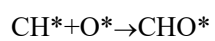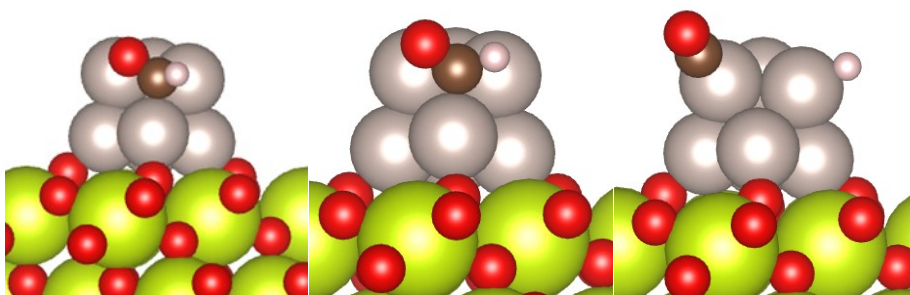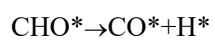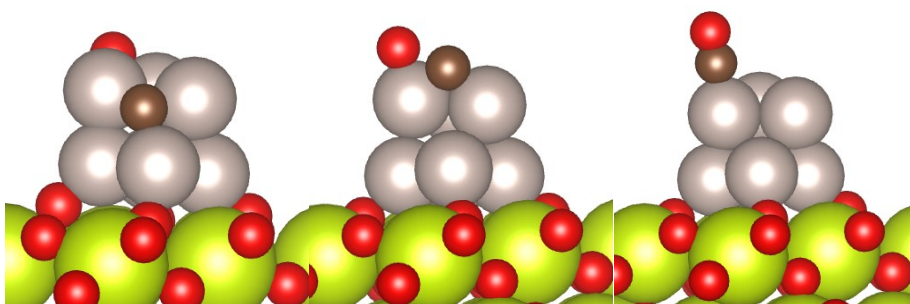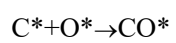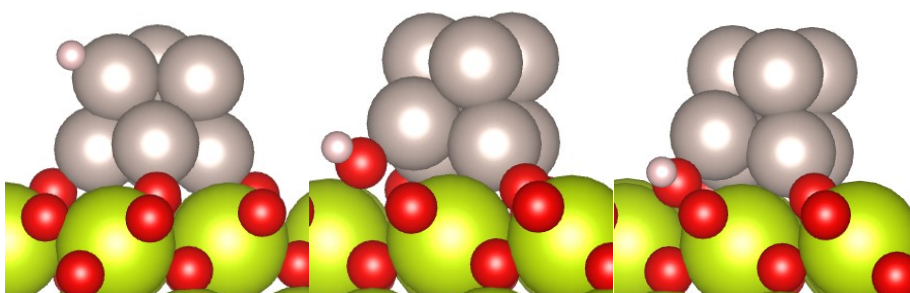

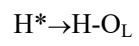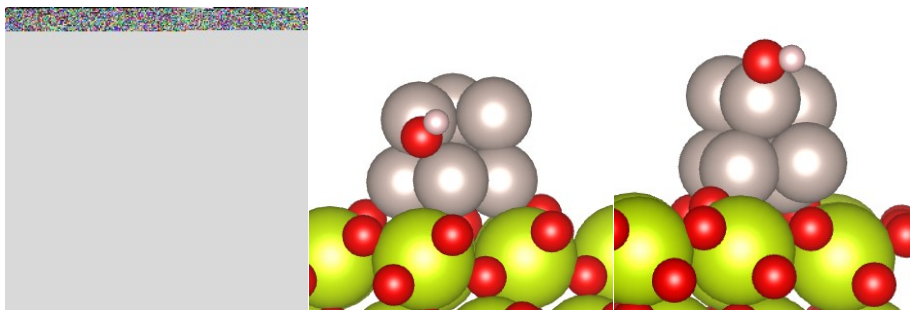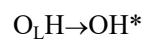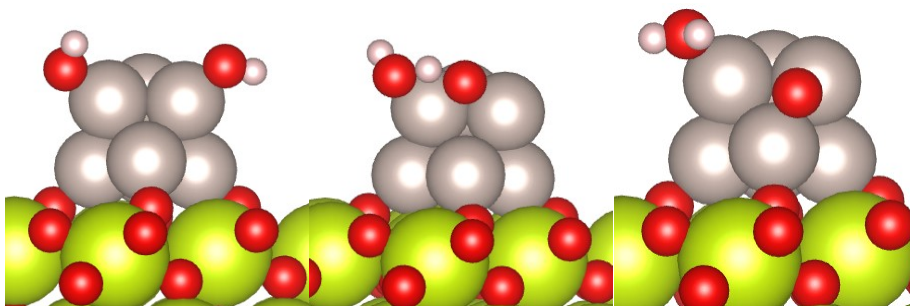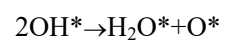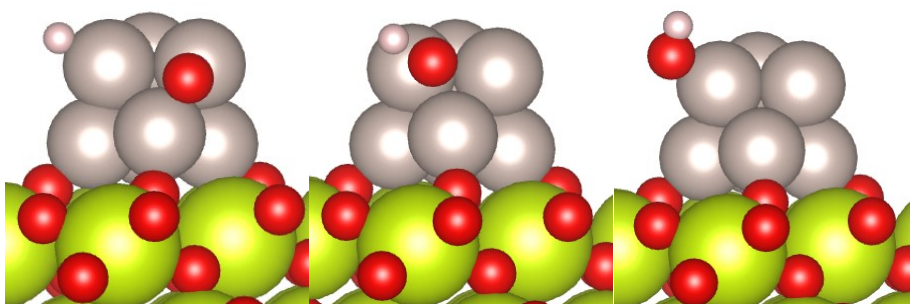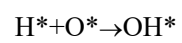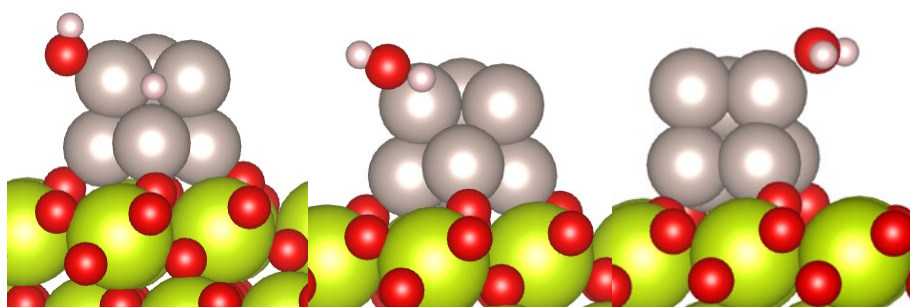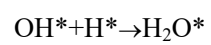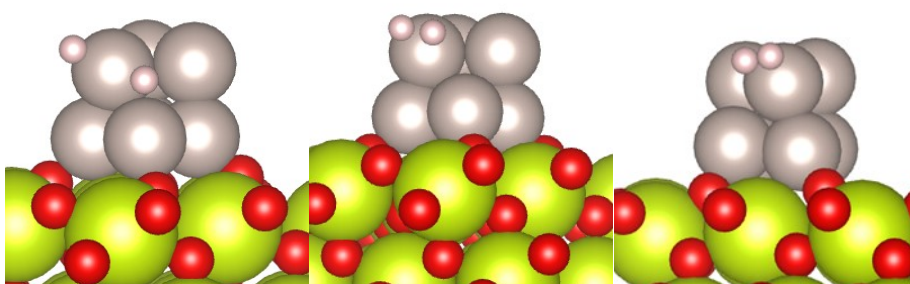



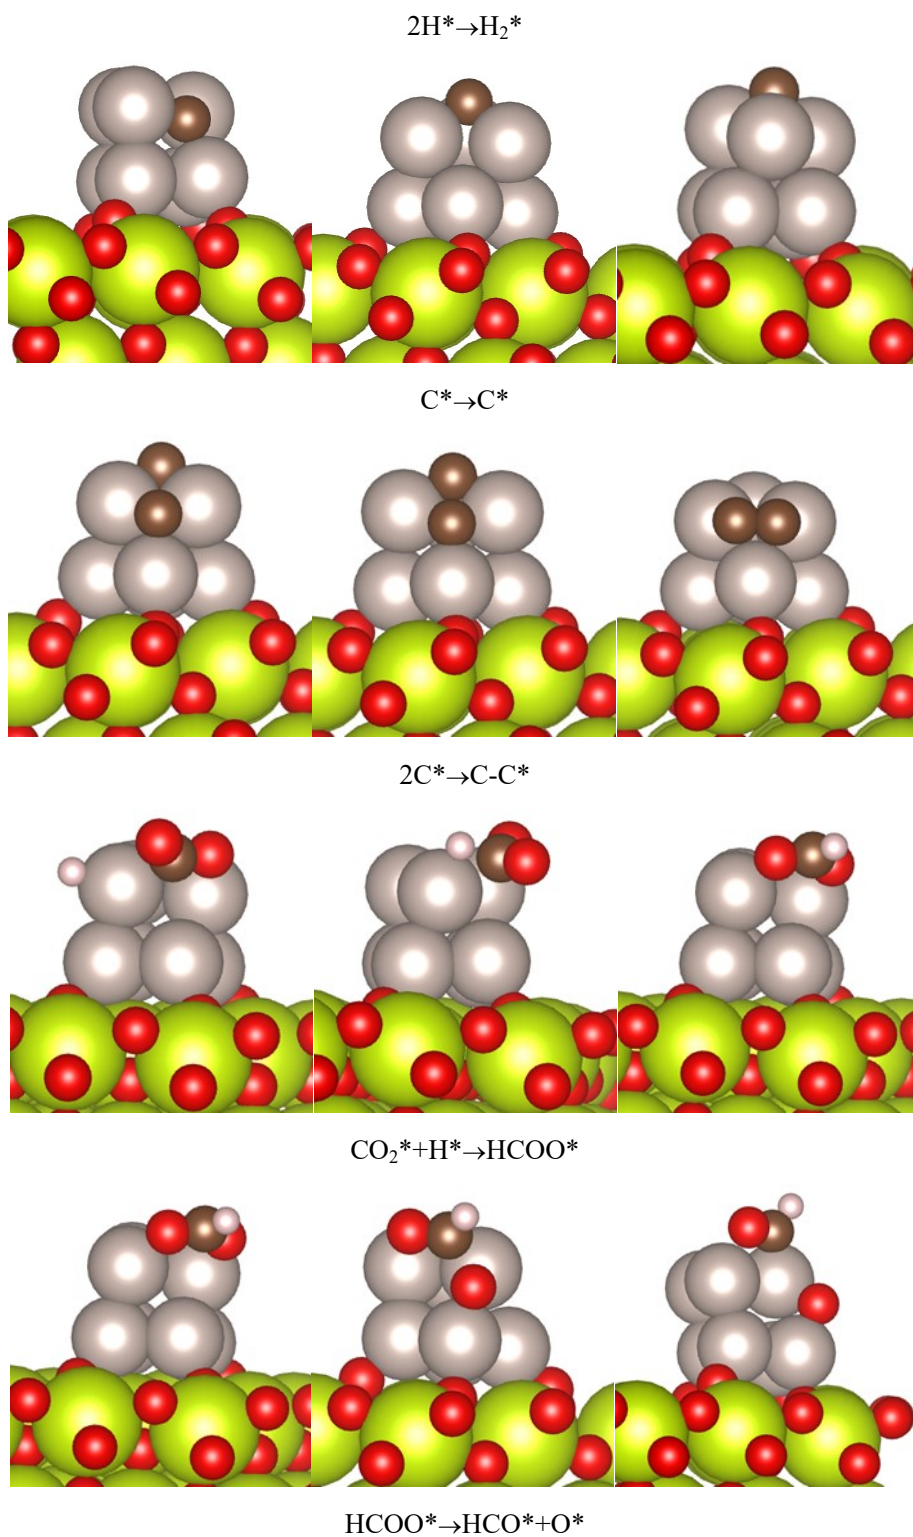

**Fig. S10** The IS, TS and FS structure on Ru<sub>7</sub>/CeO<sub>2</sub>(111)

**Table S1** Calculated adsorption energy ( $E_{\text{ads}}$ ) of the species involved in DRM on Ru<sub>7</sub>/CeO<sub>2</sub>(110) and Ru<sub>7</sub>/CeO<sub>2</sub>(111) models

| adsorption species | Ru <sub>7</sub> /CeO <sub>2</sub> (110) (eV) | Ru <sub>7</sub> /CeO <sub>2</sub> (111) (eV) |
|--------------------|----------------------------------------------|----------------------------------------------|
|--------------------|----------------------------------------------|----------------------------------------------|

|                   |       |       |
|-------------------|-------|-------|
| CH <sub>4</sub> * | -0.64 | -0.56 |
| CH <sub>3</sub> * | -2.17 | -2.55 |
| CH <sub>2</sub> * | -4.08 | -4.48 |
| CH*               | -6.10 | -6.45 |
| C*                | -7.52 | -7.92 |
| CHO*              | -2.89 | -3.10 |
| OH*               | -4.52 | -4.53 |
| H*                | -2.32 | -2.98 |
| H-O <sub>L</sub>  | -2.57 | -2.60 |
| O*                | -5.36 | -5.56 |
| O#                | -6.38 | -6.63 |
| H <sub>2</sub> O* | -1.62 | -0.80 |
| H <sub>2</sub> *  | -1.02 | -0.38 |
| CO                | -1.99 | -1.39 |
| CO <sub>2</sub> # | -0.70 | -0.54 |
| CO <sub>2</sub> * | -1.15 | -0.73 |
| HCOO*             | -3.80 | -3.92 |
| COOH*             | -2.91 | -3.24 |

**Table S2** Calculated energetics results of CO<sub>2</sub> hydrogenation steps (unit: eV)

| CO <sub>2</sub> hydrogenation steps | Ru <sub>7</sub> /CeO <sub>2</sub> (110) | Ru <sub>7</sub> /CeO <sub>2</sub> (111) |
|-------------------------------------|-----------------------------------------|-----------------------------------------|
|                                     | Ea/ΔE                                   | Ea/ΔE                                   |
| CO <sub>2</sub> * + H* → HCOO*      | 0.60/-0.85                              | 0.54/-0.58                              |
| HCOO* → HCO* + O*                   | 1.69/1.05                               | 1.76/0.92                               |
| HCOO* + H* → HCOOH*                 | —/1.55                                  | —/—                                     |
| CO <sub>2</sub> * + H* → COOH*      | 1.78/0.55                               | 1.45/0.09                               |
| COOH* → CO* + OH*                   | 0.40/-1.63                              | 0.50/-1.48                              |

**Table S3** Calculated energetics results of C\* diffusion and C-C coupling (unit: eV)

| CO <sub>2</sub> hydrogenation steps | Ru <sub>7</sub> /CeO <sub>2</sub> (110) | Ru <sub>7</sub> /CeO <sub>2</sub> (111) |
|-------------------------------------|-----------------------------------------|-----------------------------------------|
|                                     | Ea/ Δ E                                 | Ea/ Δ E                                 |
| C*, diffusion                       | 0.68/0.42                               | 2.20/1.78                               |
| 2C* → C-C*                          | 1.39/-0.56                              | 0.89/-0.55                              |

**Table S4** Calculated Net Rates of Reactions at 1000K and 1atm

| Reaction steps of DRM                                                                                          | Net Rate of Reaction (site <sup>-1</sup> s <sup>-1</sup> ) |                                         |
|----------------------------------------------------------------------------------------------------------------|------------------------------------------------------------|-----------------------------------------|
|                                                                                                                | Ru <sub>7</sub> /CeO <sub>2</sub> (110)                    | Ru <sub>7</sub> /CeO <sub>2</sub> (111) |
| 2* <sub>s</sub> + CH <sub>4</sub> <sub>g</sub> ↔ H-CH <sub>3</sub> * + * <sub>s</sub> → CH <sub>3</sub> * + H* | 0.00060                                                    | 2.60x10 <sup>-8</sup>                   |
| * <sub>s</sub> + CH <sub>3</sub> * ↔ H-CH <sub>2</sub> * + * <sub>s</sub> → CH <sub>2</sub> * + H*             | 0.00060                                                    | 2.60x10 <sup>-8</sup>                   |
| * <sub>s</sub> + CH <sub>2</sub> * ↔ H-CH* + * <sub>s</sub> → CH* + H*                                         | 0.00060                                                    | 2.60x10 <sup>-8</sup>                   |
| * <sub>s</sub> + CH* ↔ H-C* + * <sub>s</sub> → C* + H*                                                         | 9.67x10 <sup>-8</sup>                                      | 1.73x10 <sup>-16</sup>                  |
| * <sub>s</sub> + # <sub>s</sub> + CO <sub>2</sub> <sub>g</sub> ↔ O-CO# + * <sub>s</sub> → CO* + O <sub>L</sub> | 0.00077                                                    | 2.60x10 <sup>-7</sup>                   |
| CO <sub>2</sub> <sub>g</sub> + H* ↔ H-COO* → COOH*                                                             | 1.95x10 <sup>-10</sup>                                     | 2.51x10 <sup>-14</sup>                  |
| COOH* + * <sub>s</sub> ↔ CO-OH* + * <sub>s</sub> → CO* + OH*                                                   | 1.95x10 <sup>-10</sup>                                     | 2.51x10 <sup>-14</sup>                  |

|                                                                          |                       |                        |
|--------------------------------------------------------------------------|-----------------------|------------------------|
| $O_L + H^* \leftrightarrow H-O_L + H^* \rightarrow O_L H^* + \#_s$       | 0.00077               | $2.60 \times 10^{-7}$  |
| $OH^* + \#_s \leftrightarrow O-H^* + \#_s \rightarrow O^* + H^*$         | 0.0006                | $2.60 \times 10^{-7}$  |
| $OH^* + H^* \leftrightarrow H-OH^* + \#_s \leftrightarrow H_2O^* + \#_s$ | 0.00016               | $4.94 \times 10^{-13}$ |
| $CH^* + O^* \leftrightarrow O-CH^* + \#_s \rightarrow CHO^* + \#_s$      | 0.00060               | $2.60 \times 10^{-7}$  |
| $C^* + O^* \leftrightarrow O-C^* + \#_s \rightarrow CO^* + \#_s$         | $9.67 \times 10^{-8}$ | $1.73 \times 10^{-16}$ |
| $CHO^* + \#_s \leftrightarrow H-CO^* + \#_s \rightarrow CO^* + H^*$      | 0.00060               | $2.60 \times 10^{-7}$  |
| $CO^* \rightarrow CO_g + \#_s$                                           | 0.00137               | $5.20 \times 10^{-7}$  |
| $H_2O^* \rightarrow H_2O_g + \#_s$                                       | 0.00016               | $4.94 \times 10^{-13}$ |
| $2H^* \leftrightarrow H-H^* + \#_s \rightarrow H_2_g + 2\#_s$            | 0.00104               | $5.20 \times 10^{-7}$  |

**Table S5** Calculated Net Rates of Reactions including C-C coupling at 1000K and 1atm

| Reaction steps of DRM                                                       | Net Rate of Reaction ( $\text{site}^{-1} \text{s}^{-1}$ ) |  |
|-----------------------------------------------------------------------------|-----------------------------------------------------------|--|
|                                                                             | Ru <sub>7</sub> /CeO <sub>2</sub> (110)                   |  |
| $2\#_s + CH_4_g \leftrightarrow H-CH_3^* + \#_s \rightarrow CH_3^* + H^*$   | $7.81 \times 10^{-5}$                                     |  |
| $\#_s + CH_3^* \leftrightarrow H-CH_2^* + \#_s \rightarrow CH_2^* + H^*$    | $7.81 \times 10^{-5}$                                     |  |
| $\#_s + CH_2^* \leftrightarrow H-CH^* + \#_s \rightarrow CH^* + H^*$        | $7.81 \times 10^{-5}$                                     |  |
| $\#_s + CH^* \leftrightarrow H-C^* + \#_s \rightarrow C^* + H^*$            | $2.65 \times 10^{-5}$                                     |  |
| $2C^* \leftrightarrow C-C^* + \#_s \rightarrow C_2^* + \#_s$                | $4.83 \times 10^{-87}$                                    |  |
| $\#_s + \#_s + CO_2_g \leftrightarrow O-CO\# + \#_s \rightarrow CO^* + O_L$ | $7.82 \times 10^{-5}$                                     |  |
| $CO_2_g + H^* \leftrightarrow H-COO^* \rightarrow COOH^*$                   | $1.65 \times 10^{-11}$                                    |  |
| $COOH^* + \#_s \leftrightarrow CO-OH^* + \#_s \rightarrow CO^* + OH^*$      | $1.65 \times 10^{-11}$                                    |  |
| $O_L + H^* \leftrightarrow H-O_L + H^* \rightarrow O_L H^* + \#_s$          | $7.82 \times 10^{-5}$                                     |  |
| $OH^* + \#_s \leftrightarrow O-H^* + \#_s \rightarrow O^* + H^*$            | $7.81 \times 10^{-5}$                                     |  |
| $OH^* + H^* \leftrightarrow H-OH^* + \#_s \leftrightarrow H_2O^* + \#_s$    | $1.23 \times 10^{-7}$                                     |  |
| $CH^* + O^* \leftrightarrow O-CH^* + \#_s \rightarrow CHO^* + \#_s$         | $5.15 \times 10^{-5}$                                     |  |
| $C^* + O^* \leftrightarrow O-C^* + \#_s \rightarrow CO^* + \#_s$            | $2.65 \times 10^{-5}$                                     |  |
| $CHO^* + \#_s \leftrightarrow H-CO^* + \#_s \rightarrow CO^* + H^*$         | $5.15 \times 10^{-5}$                                     |  |
| $CO^* \rightarrow CO_g + \#_s$                                              | 0.00016                                                   |  |
| $H_2O^* \rightarrow H_2O_g + \#_s$                                          | $1.23 \times 10^{-7}$                                     |  |
| $2H^* \leftrightarrow H-H^* + \#_s \rightarrow H_2_g + 2\#_s$               | 0.00016                                                   |  |

**Note:** Ru<sub>7</sub>/CeO<sub>2</sub>(111) is deactivation by C-C coupling and not has reaction rate.

**Table S2.** Calculated energetics results of elementary reactions involved in methane reforming reaction network on Ru<sub>7</sub>/CeO<sub>2</sub>(110) and Ru<sub>7</sub>/CeO<sub>2</sub>(111) models (unit: eV)

| Reaction steps of DRM              | Ru <sub>7</sub> /CeO <sub>2</sub> (110) | Ru <sub>7</sub> /CeO <sub>2</sub> (111) |
|------------------------------------|-----------------------------------------|-----------------------------------------|
|                                    | $E_a/\Delta E$                          | $E_a/\Delta E$                          |
| $CH_4(g) \rightarrow CH_3^* + H^*$ | 0.29/-0.41                              | 0.58/-0.04                              |
| $CH_3^* \rightarrow CH_2^* + H^*$  | 0.63/0.16                               | 0.50/0.34                               |
| $CH_2^* \rightarrow CH^* + H^*$    | 0.27/-0.53                              | 0.39/-0.51                              |
| $CH^* \rightarrow C^* + H^*$       | 0.67/0.12                               | 0.55/-0.28                              |
| $CO_2^* \rightarrow CO^* + O^*$    | 1.32/-0.27                              | 1.14/0.53                               |
| $CO_2_v \rightarrow CO^* + O_v$    | 0.69/-1.20                              | 0.27/-1.73                              |
| $CO_2^* + H^* \rightarrow COOH^*$  | 1.78/0.55                               | 1.45/0.09                               |
| $COOH^* \rightarrow CO^* + OH^*$   | 0.40/-1.63                              | 0.50/-1.48                              |

---

|                                                              |            |            |
|--------------------------------------------------------------|------------|------------|
| $\text{CH}^* + \text{O}^* \rightarrow \text{CHO}^*$          | 0.99/-0.46 | 1.40/-0.05 |
| $\text{CHO}^* \rightarrow \text{CO}^* + \text{H}^*$          | 0.50/-0.53 | 0.56/-0.60 |
| $\text{C}^* + \text{O}^* \rightarrow \text{CO}^*$            | 2.65/-0.85 | 4.83/-0.05 |
| $2\text{OH}^* \rightarrow \text{H}_2\text{O}^* + \text{O}^*$ | 0.31/-0.31 | 0.73/-0.48 |
| $\text{O}^* + \text{H}^* \rightarrow \text{OH}^*$            | 1.32/-0.93 | 1.05/-0.98 |
| $\text{OH}^* + \text{H}^* \rightarrow \text{H}_2\text{O}^*$  | 1.43/0.47  | 2.02/1.05  |
| $2\text{H}^* \rightarrow \text{H}_2^*$                       | 0.54/0.23  | 0.63/0.47  |

---
